# Supplementary material
Source: PubMed Central journal article supplement (PMC4169293)
Supplement: NIHMS514533-supplement-Supplementary_Data.pdf [file NIHMS514533-supplement-Supplementary_Data.pdf]

## **S1 Supporting Information.**

### **Insights into the Binding Modes and Mechanism of Action of Atypical Retinoids as Ligands of SHP Receptor.**

Marco Cellanetti, Viswanath Gunda, Li Wang, Antonio Macchiarulo,\* Roberto Pellicciari.

#### **Table of Contents:**

**Table s1.** Results of geometrical analyses performed on the homology models of SHP with Molprobability server.

**Figure s1.** a) Verify3D plot of SHP<sub>DAX-1</sub> structure. b) Verify3D plot of SHP<sub>USP</sub> structure.

**Figure s2.** a) Verify3D plot of SHP<sub>RXR $\alpha$</sub>  structure. b) Verify3D plot of SHP<sub>RXR $\alpha$</sub> \* structure.

**Table s2.** Primers used for the mutagenesis assays.

## S2.

**Table s1.**

|                                       | <b>SHP<sub>DAX-1</sub></b> | <b>SHP<sub>USP</sub></b> | <b>SHP<sub>RXR<math>\alpha</math></sub></b> | <b>SHP<sub>RXR<math>\alpha</math></sub><sup>*</sup></b> |
|---------------------------------------|----------------------------|--------------------------|---------------------------------------------|---------------------------------------------------------|
| Template<br>(pdb code)                | 3F5C                       | 1G2N                     | 1MV9                                        | 1DKF                                                    |
| Clash score <sup>a</sup>              | 2.85                       | 9.93                     | 6.53                                        | 10.97                                                   |
| Poor rotamers<br>(%)                  | 4.83%                      | 4.83%                    | 3.92%                                       | 4.37%                                                   |
| % Outliers in<br>Ramachandran<br>plot | 2.47%                      | 2.07%                    | 3.77%                                       | 1.66%                                                   |
| % Favoured in<br>Ramachandran<br>plot | 86.01%                     | 84.71%                   | 85.36%                                      | 87.72%                                                  |
| % Residue with<br>bad bonds           | 0.00%                      | 0.00%                    | 0.00%                                       | 0.41%                                                   |
| % Residue with<br>bad angles          | 2.04%                      | 0.41%                    | 1.24%                                       | 0.41%                                                   |

<sup>a</sup>The clash score is an index of the number of serious steric overlaps (> 0.4 Å) occurring per 1000 atoms.

S3

Figure s1

a)

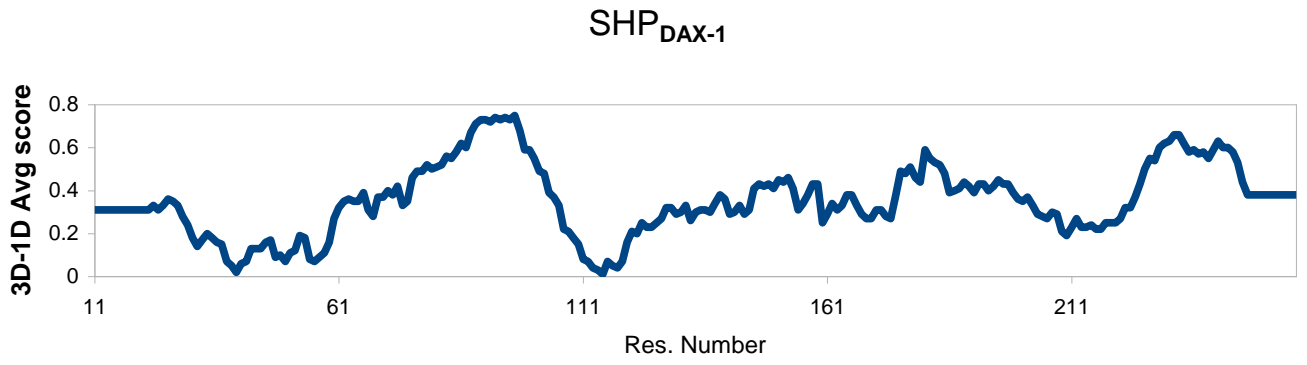

b)

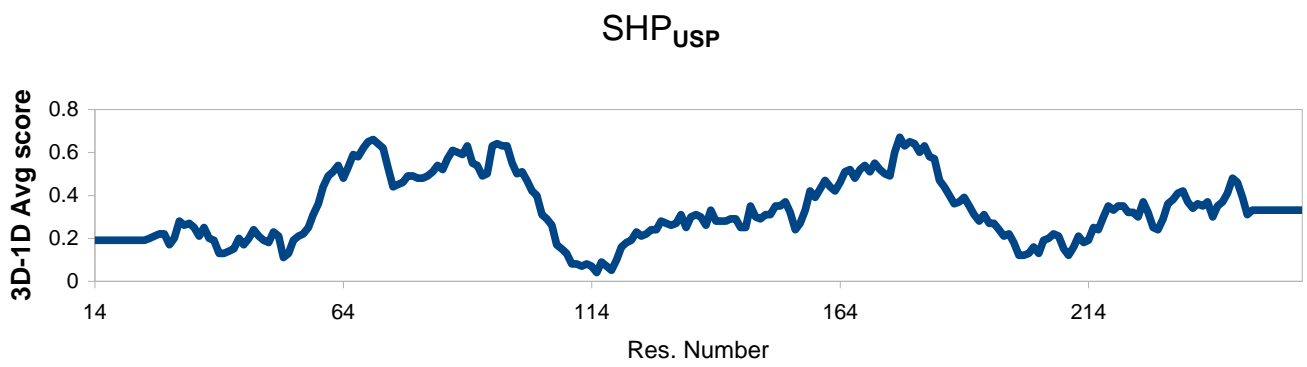

S4

Figure s2

c)

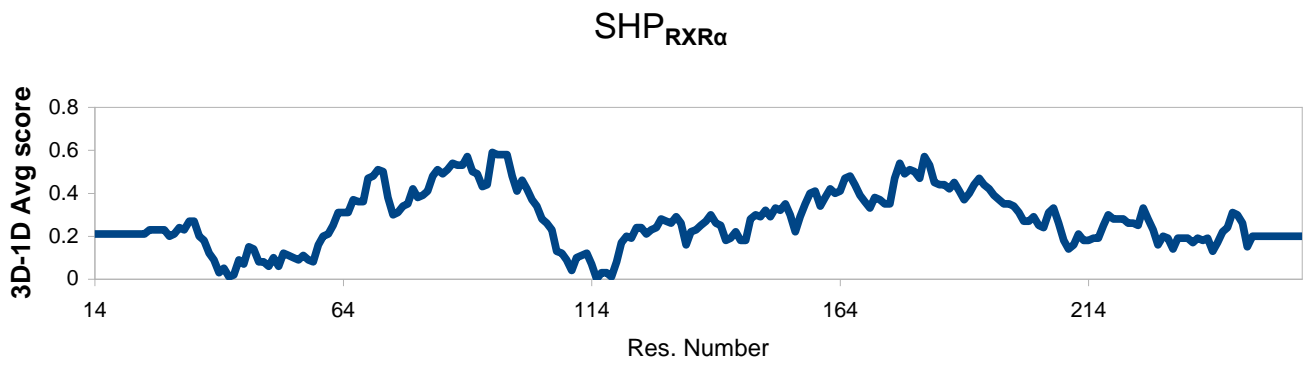

d)

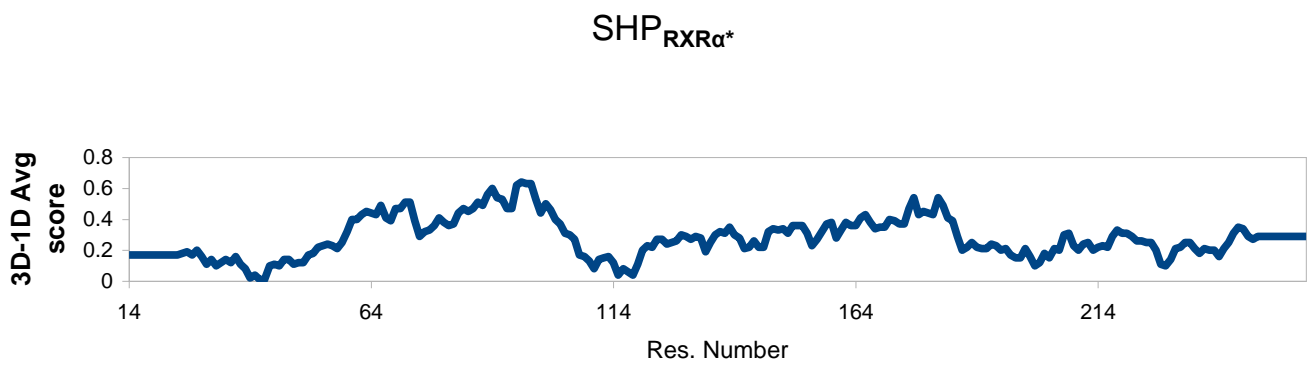

Table s2.

| Primer    | Sequence                                    |
|-----------|---------------------------------------------|
| R138D (F) | 5'-ggCCAActgCCAgACgATCCCCAgCCCTCCCTg-3'     |
| R138D (R) | 5'-CAgggAgggCTggggATCgTCTggCagTTggCC-3'     |
| R238D (F) | 5'-CTgCTTggggACCTCTTCTTTgACCCTATCATTggAg-3' |
| R238D (R) | 5'-CTCCAATgATAgggTCAAAgAAgAggTCCCCAAgCag-3' |
| R238A (F) | 5'-CTgCTTggggACCTCTTCTTTgCCCCTATCATTggAg-3' |
| R238A (R) | 5'-CTCCAATgATAggggCAAAgAAgAggTCCCCAAgCag-3' |
| R138A (F) | 5'-CCAActgCCAgACgCACCCCAgCCCTCC-3'          |
| R138A (R) | 5'-ggAgggCTggggTgCgTCTggCagTTgg-3'          |
| W92A (F)  | 5'-gCTgCAgggTTgCgCgggCCCCCTCTTC-3'          |
| W92A (R)  | 5'-gAAgAgggggCCCgCgCAACCCTgCagC-3'          |
| F96A (F)  | 5'-CTggggCCCCCTCgCCCTgCTTgggTTg-3'          |
| F96A (R)  | 5'-CAACCCAAgCAgggCgAgggggCCCCAg-3'          |
| W148A (F) | 5'-CTggCTgCggTgCAggCgCTTCAATgCTgTCTg-3'     |
| W148A (R) | 5'-CAgACAgCATTgAAgCgCCTgCACCGCagCCAg-3'     |
| R34A (F)  | 5'-CAAaggCTgTCCCCgCACCCCGTAgCCgC-3'         |
| R34A (R)  | 5'-gCggCTACggggTgCggggACAgCCTTg-3'          |
| Q134R (F) | 5'-AgTggAggCagTggCagACTgCCAgACAgACC-3'      |
| Q134R (R) | 5'-ggTCTgTCTggCagTCTgCCTgCCTCCACT-3'        |
| R34Q (F)  | 5'-ggCTgTCCCCCAACCCCGTAgCC-3'               |
| R34Q (R)  | 5'-ggCTACggggTTgggggACAgCC-3'               |
